# Supplementary material
Source: publisher site journal article supplement (https://www.dovepress.com/article/553042)
Supplement: Supplementary file 1 [file Supplementary.docx]

**Supplementary Table**

**Table S1. Proportion of missing variables**

| **Variables** | **Missing number** | | **Miss rate (%)** |
| --- | --- | --- | --- |
| Gender | 0 | 0 | |
| Age | 0 | 0 | |
| Respiratory system | 0 | 0 | |
| Gastrointestinal tract | 0 | 0 | |
| Urinary system | 0 | 0 | |
| Other infections | 0 | 0 | |
| Hypertension | 0 | 0 | |
| Diabetes | 0 | 0 | |
| Heart failure | 0 | 0 | |
| ACS | 0 | 0 | |
| Cirrhosis | 0 | 0 | |
| Renal dysfunction | 0 | 0 | |
| Chronic dialysis | 0 | 0 | |
| Brain injury | 0 | 0 | |
| Respiratory dysfunction | 0 | 0 | |
| HOT | 0 | 0 | |
| Mechanical ventilation | 0 | 0 | |
| Vasoactive drugs | 0 | 0 | |
| Temperature | 0 | 0 | |
| Heart rate | 0 | 0 | |
| Respiratory rate | 0 | 0 | |
| GCS | 0 | 0 | |
| MAP | 0 | 0 | |
| Hematocrit | 40 | 0.45 | |
| Hemoglobin | 47 | 0.53 | |
| Neutrophil percentage | 61 | 0.69 | |
| Neutrophils | 65 | 0.74 | |
| Lymphocytes | 65 | 0.74 | |
| Lymphocyte percentage | 79 | 0.90 | |
| Platelets | 123 | 1.40 | |
| Creatinine | 134 | 1.53 | |
| BUN | 138 | 1.58 | |
| AST | 177 | 2.02 | |
| Arterial pH | 186 | 2.13 | |
| PT | 194 | 2.22 | |
| APTT | 196 | 2.24 | |
| INR | 200 | 2.29 | |
| TT | 212 | 2.42 | |
| Oxygenation index | 229 | 2.62 | |
| Albumin | 291 | 3.33 | |
| ALT | 382 | 4.37 | |
| TBIL | 400 | 4.58 | |
| DBIL | 426 | 4.88 | |
| WBC | 467 | 5.34 | |
| Ddimers | 651 | 7.45 | |
| Blood potassium | 1095 | 12.54 | |
| Blood sodium | 1098 | 12.57 | |
| Blood chloride | 1108 | 12.69 | |
| Procalcitonin | 1492 | 17.09 | |
| CRP | 1551 | 17.76 | |
| Lactate | 4515 | 51.72 | |
| ACS: acute coronary syndrome; HOT: home oxygen therapy; GCS: Glasgow Coma Scale; MAP: mean arterial pressure; WBC: white blood cell; CRP: C-reactive protein; BUN: blood urea nitrogen; ALT: alanine aminotransferase; AST: aspartate aminotransferase; TBIL: total bilirubin; DBIL: direct bilirubin; PT: prothrombin time; APTT: activated partial thromboplastin time; TT: Thrombin time; INR: international normalized ratio. | | | |

**Table S2. Baseline comparison of patients in training set and test set**

|  | **Total**  **(N=8729)** | **Training set**  **(N=6110)** | **Test set**  **(N=2619)** | **p value** |
| --- | --- | --- | --- | --- |
| **Demographic information** |  |  |  |  |
| Gender, (male%) | 5406 (61.9) | 3770 (61.7) | 1636 (62.5) | 0.5 |
| Age | 69 (56-81) | 69 (56-81) | 69 (55-80) | 0.424 |
| **Infection source** |  |  |  |  |
| Respiratory system | 5033 (57.7) | 3556 (58.2) | 1477 (56.4) | 0.118 |
| Gastrointestinal tract | 2109 (24.2) | 1455 (23.8) | 654 (25.0) | 0.247 |
| Urinary system | 1334 (15.3) | 937 (15.3) | 397 (15.2) | 0.833 |
| Other infections | 1304 (14.9) | 885 (14.5) | 419 (16.0) | 0.069 |
| **Comorbidities** |  |  |  |  |
| Hypertension | 3505 (40.2) | 2480 (40.6) | 1025 (39.1) | 0.205 |
| Diabetes | 2591 (29.7) | 1813 (29.7) | 778 (29.7) | 0.975 |
| Heart failure | 1682 (19.3) | 1189 (19.5) | 493 (18.8) | 0.49 |
| ACS | 710 (8.1) | 490 (8.0) | 220 (8.4) | 0.551 |
| Cirrhosis | 296 (3.4) | 203 (3.3) | 93 (3.6) | 0.589 |
| Renal dysfunction | 887 (10.2) | 605 (9.9) | 282 (10.8) | 0.22 |
| Chronic dialysis | 189 (2.2) | 123 (2.0) | 66 (2.5) | 0.136 |
| Brain injury | 1880 (21.5) | 1288 (21.1) | 592 (22.6) | 0.112 |
| Respiratory dysfunction | 1242 (14.2) | 876 (14.3) | 366 (14.0) | 0.657 |
| HOT | 46 (0.5) | 30 (0.5) | 16 (0.6) | 0.478 |
| **Vital signs** |  |  |  |  |
| Temperature | 36.8  (36.5-37.6) | 36.8  (36.5-37.6) | 36.8  (36.5-37.6) | 0.948 |
| Heart rate | 99 (84-115) | 99 (84-115) | 98 (84-115) | 0.513 |
| Respiratory rate | 20 (19-24) | 20 (19-24) | 20 (19-24) | 0.612 |
| MAP | 88 (75-99) | 88 (75-99) | 88 (76-100) | 0.098 |
| **Laboratory indicators** |  |  |  |  |
| Arterial pH | 7.4  (7.35-7.45) | 7.4  (7.35-7.44) | 7.4  (7.35-7.45) | 0.622 |
| Oxygenation index | 264  (198-345) | 266  (197-345) | 263  (203-345) | 0.954 |
| WBC | 10.88  (7.35-15.88) | 10.85  (7.36-15.84) | 11.04  (7.32-15.93) | 0.692 |
| Neutrophils | 9.38  (5.94-14.04) | 9.33  (5.96-14.02) | 9.48  (5.88-14.16) | 0.596 |
| Neutrophil percentage | 87.5  (80.8-92.0) | 87.5  (80.8-92.0) | 87.4  (80.8-91.9) | 0.982 |
| Lymphocytes | 0.71  (0.44-1.11) | 0.7  (0.43-1.11) | 0.72  (0.45-1.1) | 0.397 |
| Lymphocyte percentage | 6.7 (3.9-11.5) | 6.7 (3.9-11.5) | 6.7 (3.9-11.5) | 0.913 |
| Hemoglobin | 110 (89-128) | 110 (89-128) | 109 (90-127) | 0.691 |
| Hematocrit | 33.1  (27.2-38.4) | 33.2  (27.0-38.5) | 32.8  (27.4-38.2) | 0.387 |
| Platelets | 153 (98-224) | 153 (98-221) | 154 (96-229) | 0.5 |
| Blood chloride | 104 (100-107) | 104 (100-107) | 104 (100-107) | 0.652 |
| Blood sodium | 138 (135-141) | 138 (135-141) | 138 (135-141) | 0.344 |
| Blood potassium | 3.91 (3.54-4.29) | 3.9 (3.54-4.28) | 3.91 (3.54-4.3) | 0.536 |
| CRP | 77  (24.7-146.0) | 77.7  (25.1-145.8) | 75.4  (23.8-146.0) | 0.463 |
| BUN | 8.8 (5.9-14.5) | 8.9 (5.9-14.6) | 8.8 (5.9-14.4) | 0.497 |
| Creatinine | 92 (64-164) | 93 (64-166) | 91 (65-162) | 0.814 |
| ALT | 27 (15-53) | 27 (15-54) | 27 (15-53) | 0.868 |
| AST | 37 (22-74) | 37 (22-75) | 37 (23-74) | 0.585 |
| TBIL | 15.3 (9.9-24.9) | 15.2 (9.9-24.6) | 15.6 (10.1-25.5) | 0.179 |
| DBIL | 4.7 (2.5-9.3) | 4.7 (2.5-9.2) | 4.7 (2.5-9.4) | 0.223 |
| Albumin | 30.9  (26.7-35.3) | 30.8  (26.6-35.3) | 31.0  (26.7-35.3) | 0.545 |
| PT | 14.2  (12.9-15.8) | 14.2  (12.9-15.8) | 14.2  (12.9-15.8) | 0.754 |
| APTT | 35.4  (30.4-42.4) | 35.5  (30.4-42.4) | 35.2  (30.3-42.4) | 0.778 |
| TT | 16.3  (14.9-17.8) | 16.3  (14.9-17.8) | 16.3  (14.9-17.8) | 0.689 |
| INR | 1.17  (1.07-1.32) | 1.17  (1.07-1.32) | 1.17  (1.07-1.32) | 0.591 |
| Ddimers | 2.4 (1.02-4.9) | 2.4 (1.03-4.94) | 2.39 (1.02-4.78) | 0.525 |
| Procalcitonin | 3.01  (0.45-16.59) | 3.07  (0.46-16.66) | 2.87  (0.43-16.01) | 0.326 |
| **GCS** | 15 (12-15) | 15 (12-15) | 15 (12-15) | 0.683 |
| **Biomarker combinations** |  |  |  |  |
| CALLY | 0.3 (0.12-1.04) | 0.3 (0.11-1.04) | 0.3 (0.12-1.05) | 0.214 |
| NLR | 12.99  (7.11-23.5) | 13.01  (7.08-23.49) | 12.97  (7.18-23.5) | 0.883 |
| CAR | 2.55  (0.78-5.12) | 2.58  (0.79-5.16) | 2.5  (0.75-5.03) | 0.346 |
| PLR | 212.6  (118.92-362.82) | 212.55  (119.62-365.21) | 212.63  (117.98-358.5) | 0.573 |
| PAR | 4.8  (3.12-7.35) | 4.8  (3.12-7.31) | 4.78  (3.14-7.45) | 0.818 |
| NAR | 0.31  (0.19-0.47) | 0.31  (0.19-0.47) | 0.31  (0.19-0.47) | 0.735 |
| **Interventions** |  |  |  |  |
| Mechanical ventilation | 1908 (21.9) | 1331 (21.8) | 577 (22.0) | 0.798 |
| Vasoactive drugs | 812 (9.3) | 586 (9.6) | 226 (8.6) | 0.156 |
| **Outcome** |  |  |  |  |
| 7-day mortality | 752 (8.6) | 526 (8.6) | 226 (8.6) | 0.975 |
| Data are presented as median (interquartile range), or number (percentage).  ACS: acute coronary syndrome; HOT: home oxygen therapy; MAP: mean arterial pressure; WBC: white blood cell; CRP: C-reactive protein; BUN: blood urea nitrogen; ALT: alanine aminotransferase; AST: aspartate aminotransferase; TBIL: total bilirubin; DBIL: direct bilirubin; PT: prothrombin time; APTT: activated partial thromboplastin time; TT: Thrombin time; INR: international normalized ratio; GCS: Glasgow Coma Scale; CALLY: CRP-albumin-lymphocyte ratio; NLR: neutrophil-to-lymphocyte ratio; CAR: CRP-to-albumin ratio; PLR: platelet-to-lymphocyte ratio; PAR: platelet-to-albumin ratio; NAR: neutrophil-to-albumin ratio. | | | | |

**Table S3. AUC values and 95% confidence intervals for all models.**

|  | **Training set** | |  | **Test set** | |
| --- | --- | --- | --- | --- | --- |
| **Models** | **AUC** | **95% CI** |  | **AUC** | **95% CI** |
| Logistic | 0.752 | 0.741-0.763 |  | 0.754 | 0.738-0.771 |
| Decision Tree | 0.686 | 0.664-0.707 |  | 0.692 | 0.674-0.709 |
| Random Forest | 0.790 | 0.771-0.808 |  | 0.755 | 0.739-0.772 |
| XGBoost | 0.789 | 0.771-0.808 |  | 0.769 | 0.752-0.785 |
| LightGBM | 0.790 | 0.771-0.809 |  | 0.765 | 0.748-0.781 |
| SVM | 0.753 | 0.733-0.772 |  | 0.736 | 0.719-0.753 |
| ANN | 0.767 | 0.748-0.787 |  | 0.757 | 0.740-0.773 |
| APACHEII | 0.710 | 0.689-0.721 |  | 0.712 | 0.695-0.730 |
| SOFA | 0.718 | 0.707-0.729 |  | 0.729 | 0.712-0.746 |
| AUC: area under the curve; CI: confidence interval; XGBoost: extreme gradient boosting; LightGBM: light gradient boosting machine; SVM: support vector machine; ANN: artificial neural network; APACHE II: Acute Physiology and Chronic Health Evaluation II score; SOFA: Sequential Organ Failure Assessment score | | | | | |

**Table S4. Calibration performance of models.**

| **Models** | **Training set** | | |  | **Test set** | |
| --- | --- | --- | --- | --- | --- | --- |
|  | | Brier Score | ICI |  | Brier Score | ICI |
| Logistic | | 0.069 | 0.067 |  | 0.069 | 0.141 |
| Decision Tree | | 0.075 | 0.19 |  | 0.075 | 0.174 |
| Random Forest | | 0.069 | 0.111 |  | 0.074 | 0.161 |
| XGBoost | | 0.072 | 0.223 |  | 0.072 | 0.198 |
| LightGBM | | 0.07 | 0.129 |  | 0.07 | 0.12 |
| SVM | | 0.073 | 0.259 |  | 0.074 | 0.267 |
| ANN | | 0.069 | 0.081 |  | 0.071 | 0.104 |
| ICI: Integrated Calibration Index; XGBoost: extreme gradient boosting; LightGBM: light gradient boosting machine; SVM: support vector machine; ANN: artificial neural network. | | | | | | |

**Table S5. The net benefit of each model across the 10%-30% threshold.**

|  | **Training set** | | |  | **Test set** | | |
| --- | --- | --- | --- | --- | --- | --- | --- |
| **Models\ threshold** | **10%** | **20%** | **30%** |  | **10%** | **20%** | **30%** |
| Logistic | 0.028 | 0.014 | 0.009 |  | 0.03 | 0.015 | 0.012 |
| Decision Tree | 0.017 | 0.009 | 0.001 |  | 0.023 | 0.008 | 0.001 |
| Random Forest | 0.034 | 0.017 | 0.01 |  | 0.007 | 0.009 | 0.012 |
| XGBoost | 0.033 | 0.013 | 0.005 |  | 0.022 | 0.016 | 0.006 |
| LightGBM | 0.034 | 0.011 | 0.006 |  | 0.029 | 0.015 | 0.009 |
| SVM | 0.027 | 0.01 | 0.001 |  | 0.028 | 0.008 | 0.001 |
| ANN | 0.03 | 0.016 | 0.008 |  | 0.031 | 0.014 | 0.005 |
| XGBoost: extreme gradient boosting; LightGBM: light gradient boosting machine; SVM: support vector machine; ANN: artificial neural network. | | | | | | | |

**Supplementary Figures**

**Fig S1. Calibration curves for the machine learning models**


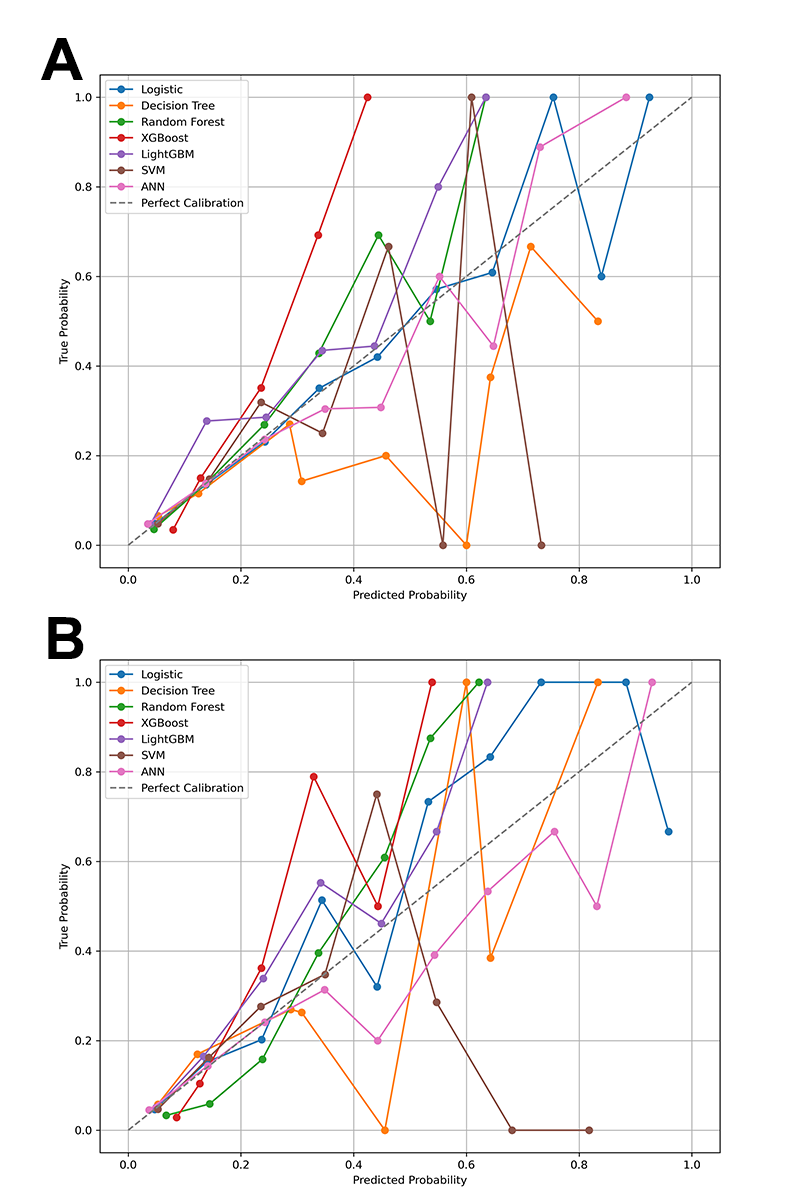


(A) Calibration curves for the machine learning models in the training set; (B) Calibration curves for the machine learning models in the test set.XGBoost: extreme gradient boosting; LightGBM: light gradient boosting machine; SVM: support vector machine; ANN: artificial neural network.

**Figure S2. Decision curve analysis (DCA) for the machine learning models**


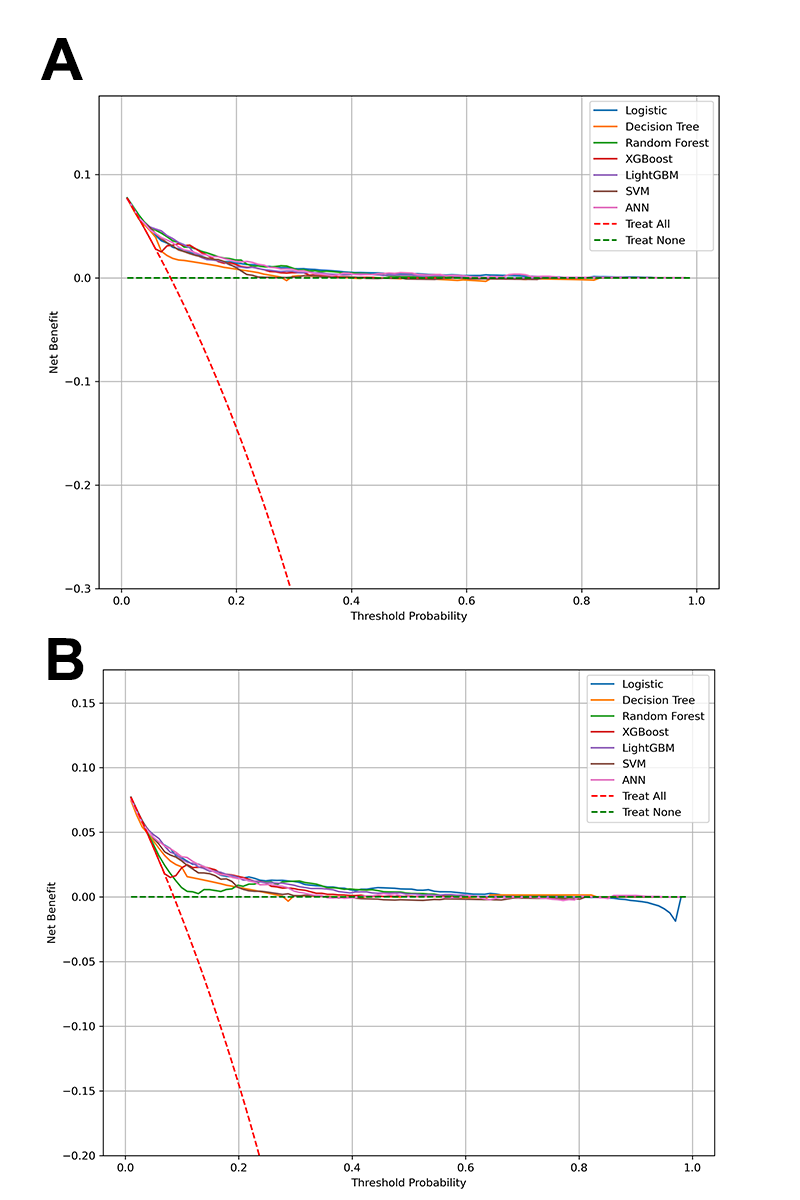


(A) Decision curve analysis for the machine learning models in the training set; (B) Decision curve analysis for the machine learning models in the test set.XGBoost: extreme gradient boosting; LightGBM: light gradient boosting machine; SVM: support vector machine; ANN: artificial neural network.

**Fig S3. The calibration curve and decision curve analysis for the ANN model in training set and test set.**


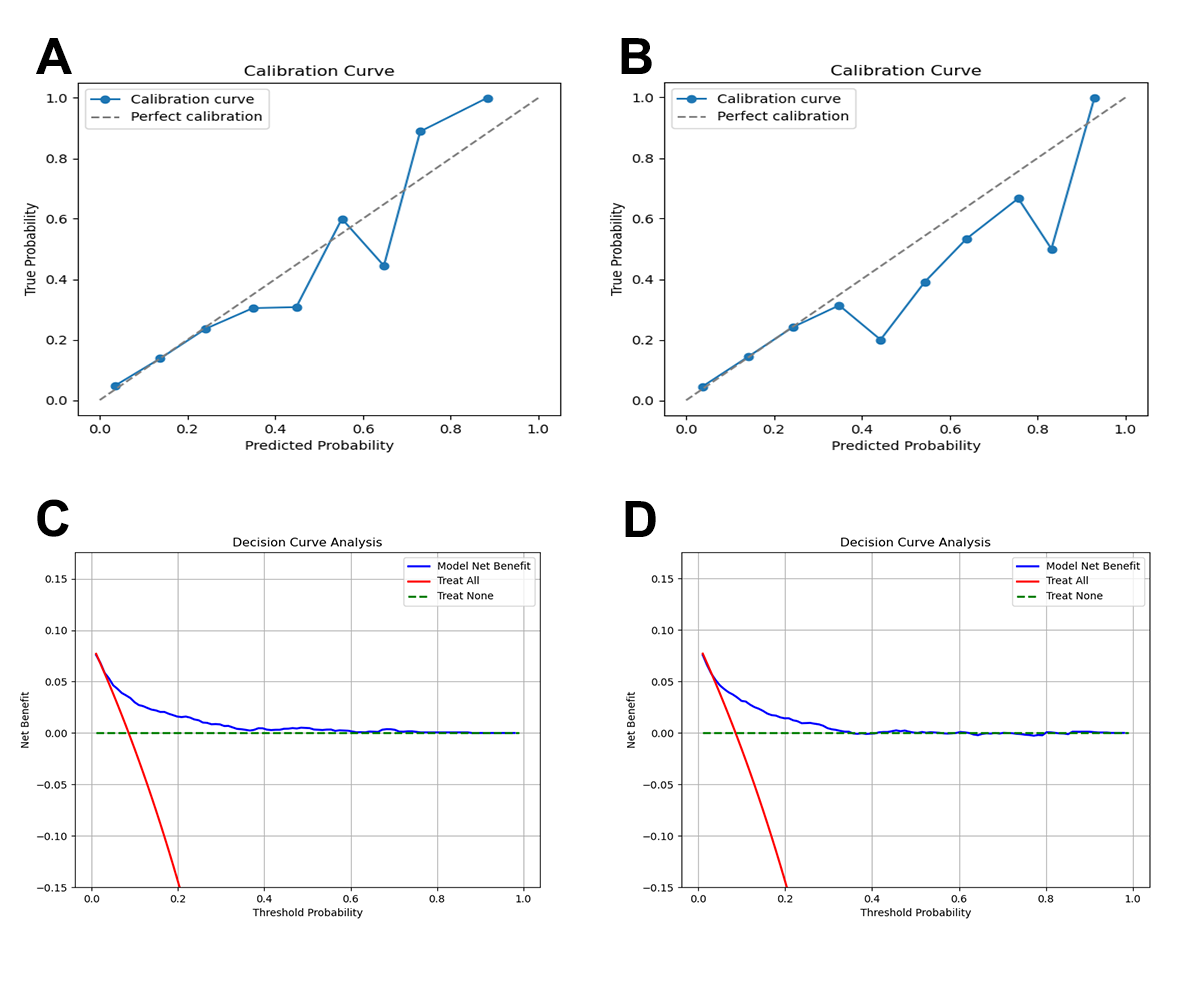


(A) Calibration curves for the ANN model in the training set; (B) Calibration curves for the ANN model in the test set. (C) Decision curve analysis for the ANN model in the training set; (D) Decision curve analysis for the ANN model in the test set.ANN: artificial neural network.

**Fig S4. ROC curves** **for the ANN model in each center.**


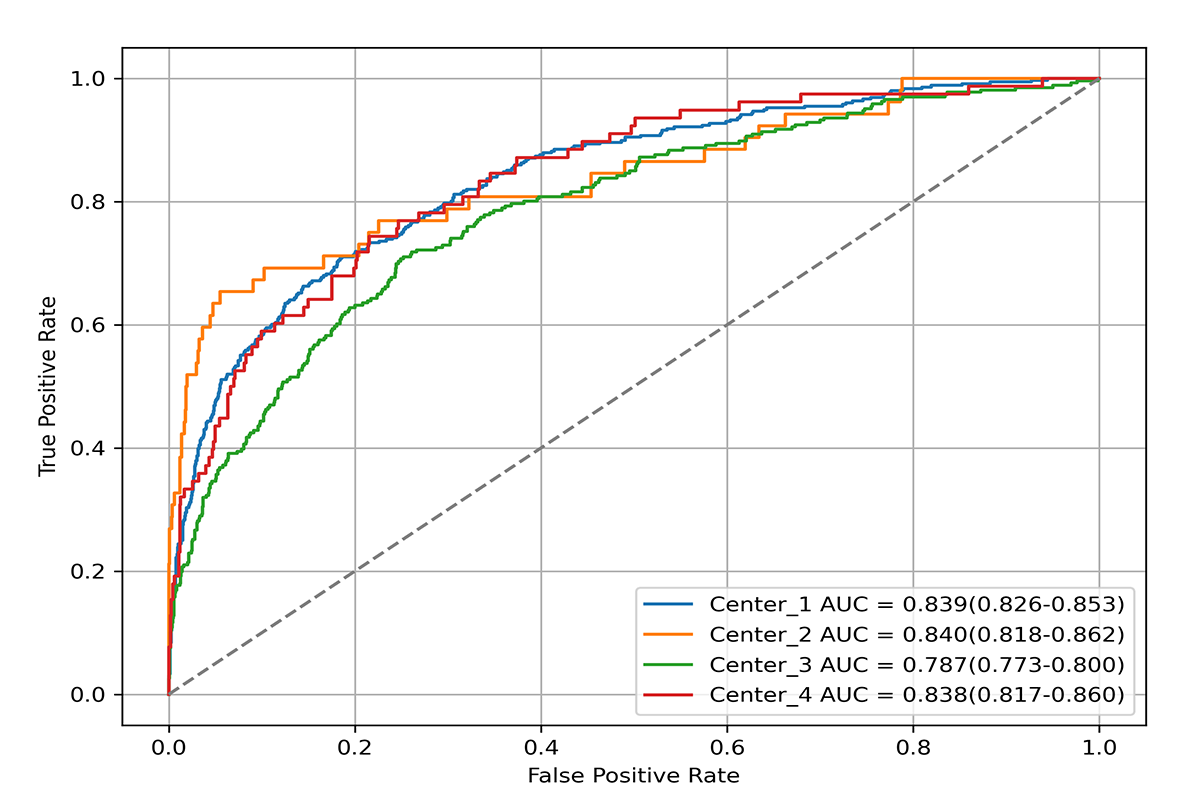


ANN: artificial neural network; AUC: area under the curve.
